# Supplementary material
Source: PubMed Central journal article supplement (PMC3940691)
Supplement: NIHMS511685-supplement-supplement_1.pdf [file NIHMS511685-supplement-supplement_1.pdf]

**Supplementary Table S1.** TagSNPs selected in *ABCB1*, *ABCC1*, and *ALDH1A1*

| Chr. | Gene  | SNP        | Coordinate | Alleles | MAF in non-AA women | P-HWE in non-AA | MAF in AA women | P-HWE in AA women |
|------|-------|------------|------------|---------|---------------------|-----------------|-----------------|-------------------|
| 7    | ABCB1 | rs17064    | 86971406   | T/A     | 0.06                | 0.61            | 0.14            | 1.00              |
| 7    | ABCB1 | rs2235048  | 86976447   | G/A     | 0.48                | 0.30            | 0.75            | 0.61              |
| 7    | ABCB1 | rs12720066 | 87007638   | C/A     | 0.05                | 0.06            | 0.04            | 1.00              |
| 7    | ABCB1 | rs4148735  | 87010817   | A/G     | 0.43                | 0.91            | 0.43            | 1.00              |
| 7    | ABCB1 | rs2235013  | 87016562   | A/G     | 0.48                | 0.20            | 0.50            | 1.00              |
| 7    | ABCB1 | rs2032588  | 87017379   | A/G     | 0.06                | 1.00            | 0.20            | 0.49              |
| 7    | ABCB1 | rs11772987 | 87023954   | G/C     | 0.11                | 1.00            | 0.16            | 1.00              |
| 7    | ABCB1 | rs868755   | 87027866   | A/C     | 0.42                | 0.05            | 0.09            | 1.00              |
| 7    | ABCB1 | rs6950978  | 87038403   | T/A     | 0.30                | 0.69            | 0.18            | 1.00              |
| 7    | ABCB1 | rs12334183 | 87039316   | G/A     | 0.17                | 0.84            | 0.35            | 0.03              |
| 7    | ABCB1 | rs13226726 | 87044551   | A/G     | 0.10                | 0.75            | 0.00            | 1.00              |
| 7    | ABCB1 | rs1202172  | 87048910   | C/A     | 0.32                | 0.37            | 0.38            | 0.65              |
| 7    | ABCB1 | rs4148733  | 87051168   | G/A     | 0.15                | 0.14            | 0.22            | 1.00              |
| 7    | ABCB1 | rs17327624 | 87054753   | A/C     | 0.20                | 0.30            | 0.20            | 0.14              |
| 7    | ABCB1 | rs2888599  | 87066961   | A/G     | 0.05                | 0.61            | 1.00            | 1.00              |
| 7    | ABCB1 | rs2214102  | 87067437   | A/G     | 0.08                | 0.73            | 0.01            | 1.00              |
| 16   | ABCC1 | rs215105   | 15956088   | G/A     | 0.05                | 0.61            | 0.03            | 1.00              |
| 16   | ABCC1 | rs215101   | 15960474   | G/C     | 0.15                | 1.00            | 0.26            | 1.00              |
| 16   | ABCC1 | rs215100   | 15962151   | G/A     | 0.29                | 0.46            | 0.54            | 1.00              |
| 16   | ABCC1 | rs12930197 | 15964946   | G/A     | 0.17                | 0.55            | 0.10            | 1.00              |
| 16   | ABCC1 | rs182482   | 15978521   | G/A     | 0.28                | 0.13            | 0.53            | 0.65              |
| 16   | ABCC1 | rs17501011 | 15988624   | A/G     | 0.04                | 0.26            | 0.01            | 1.00              |
| 16   | ABCC1 | rs152023   | 15992737   | G/A     | 0.31                | 0.48            | 0.58            | 1.00              |
| 16   | ABCC1 | rs246219   | 15993136   | A/G     | 0.15                | 1.00            | 0.22            | 1.00              |
| 16   | ABCC1 | rs152022   | 15994167   | C/G     | 0.21                | 0.72            | 0.41            | 0.65              |
| 16   | ABCC1 | rs17501331 | 15996942   | G/A     | 0.09                | 0.73            | 0.02            | 1.00              |
| 16   | ABCC1 | rs6498595  | 16003453   | C/G     | 0.10                | 0.71            | 0.25            | 1.00              |
| 16   | ABCC1 | rs11075289 | 16005869   | A/G     | 0.34                | 0.89            | 0.46            | 0.64              |
| 16   | ABCC1 | rs16967145 | 16014471   | A/G     | 0.16                | 0.06            | 0.37            | 1.00              |
| 16   | ABCC1 | rs3784863  | 16018456   | C/A     | 0.27                | 0.88            | 0.33            | 1.00              |
| 16   | ABCC1 | rs246240   | 16026525   | G/A     | 0.17                | 0.83            | 0.08            | 1.00              |

|    |         |            |          |     |      |         |      |      |
|----|---------|------------|----------|-----|------|---------|------|------|
| 16 | ABCC1   | rs246238   | 16031023 | A/T | 0.11 | 1.00    | 0.25 | 1.00 |
| 16 | ABCC1   | rs11642957 | 16031509 | A/G | 0.49 | 0.82    | 0.85 | 0.26 |
| 16 | ABCC1   | rs16967126 | 16035919 | G/A | 0.08 | 0.64    | 0.18 | 0.26 |
| 16 | ABCC1   | rs246233   | 16036752 | C/A | 0.10 | 1.00    | 0.03 | 1.00 |
| 16 | ABCC1   | rs903880   | 16038015 | A/C | 0.22 | 0.37    | 0.75 | 0.49 |
| 16 | ABCC1   | rs8054670  | 16039635 | G/A | 0.22 | 1.00    | 0.34 | 0.65 |
| 16 | ABCC1   | rs246230   | 16040381 | A/G | 0.15 | 0.81    | 0.30 | 1.00 |
| 16 | ABCC1   | rs246227   | 16043648 | G/A | 0.10 | 1.00    | 0.46 | 1.00 |
| 16 | ABCC1   | rs12445600 | 16053248 | G/A | 0.25 | 0.45    | 0.26 | 1.00 |
| 16 | ABCC1   | rs3765129  | 16057402 | A/G | 0.14 | 0.31    | 0.02 | 1.00 |
| 16 | ABCC1   | rs35596    | 16060441 | G/A | 0.24 | 0.74    | 0.60 | 1.00 |
| 16 | ABCC1   | rs17287570 | 16062604 | C/A | 0.18 | 0.43    | 0.07 | 1.00 |
| 16 | ABCC1   | rs9932506  | 16068926 | A/G | 0.49 | 0.64    | 0.27 | 1.00 |
| 16 | ABCC1   | rs35621    | 16076109 | A/G | 0.11 | 0.78    | 0.08 | 1.00 |
| 16 | ABCC1   | rs4148350  | 16077978 | A/C | 0.06 | 0.61    | 0.14 | 1.00 |
| 16 | ABCC1   | rs4148354  | 16082007 | G/A | 0.47 | 0.35    | 0.86 | 1.00 |
| 16 | ABCC1   | rs3887412  | 16082531 | T/A | 0.16 | 0.32    | 0.38 | 1.00 |
| 16 | ABCC1   | rs10852377 | 16084325 | A/G | 0.24 | 0.00001 | 0.50 | 1.00 |
| 16 | ABCC1   | rs2889517  | 16089457 | A/G | 0.30 | 0.67    | 0.46 | 1.00 |
| 16 | ABCC1   | rs2074087  | 16091733 | C/G | 0.16 | 0.006   | 0.23 | 0.03 |
| 16 | ABCC1   | rs2074085  | 16103399 | G/A | 0.12 | 0.42    | 0.19 | 0.26 |
| 16 | ABCC1   | rs8053266  | 16104334 | A/G | 0.03 | 1.00    | 0.01 | 1.00 |
| 16 | ABCC1   | rs11861115 | 16107171 | A/G | 0.23 | 0.74    | 0.30 | 1.00 |
| 16 | ABCC1   | rs11864374 | 16109386 | A/G | 0.24 | 0.65    | 0.23 | 0.06 |
| 16 | ABCC1   | rs3784867  | 16110846 | A/G | 0.18 | 1.00    | 0.40 | 0.65 |
| 16 | ABCC1   | rs3887893  | 16113002 | G/A | 0.40 | 0.04    | 0.49 | 0.16 |
| 16 | ABCC1   | rs9673292  | 16113242 | C/G | 0.03 | 1.00    | 0.10 | 1.00 |
| 16 | ABCC1   | rs4148373  | 16119605 | A/G | 0.05 | 1.00    | 0.04 | 1.00 |
| 16 | ABCC1   | rs2299670  | 16128359 | G/A | 0.34 | 0.90    | 0.63 | 0.35 |
| 16 | ABCC1   | rs212081   | 16133472 | A/G | 0.36 | 0.62    | 0.36 | 0.16 |
| 16 | ABCC1   | rs212082   | 16134648 | G/A | 0.21 | 0.73    | 0.18 | 0.14 |
| 16 | ABCC1   | rs212087   | 16137791 | A/G | 0.38 | 0.27    | 0.17 | 0.53 |
| 9  | ALDH1A1 | rs8187996  | 74706315 | A/G | 0.05 | 0.49    | 0.07 | 1.00 |
| 9  | ALDH1A1 | rs3764435  | 74706696 | C/A | 0.49 | 0.56    | 0.83 | 0.26 |
| 9  | ALDH1A1 | rs168351   | 74707131 | G/A | 0.12 | 0.44    | 0.05 | 0.37 |
| 9  | ALDH1A1 | rs1888202  | 74709071 | C/G | 0.46 | 1.00    | 0.83 | 0.49 |

|   |         |           |          |     |      |      |      |      |
|---|---------|-----------|----------|-----|------|------|------|------|
| 9 | ALDH1A1 | rs63319   | 74714604 | A/C | 0.47 | 0.56 | 0.67 | 1.00 |
| 9 | ALDH1A1 | rs8187950 | 74724858 | G/A | 0.03 | 1.00 | 0.02 | 1.00 |
| 9 | ALDH1A1 | rs348459  | 74727410 | G/A | 0.06 | 0.20 | 0.16 | 0.61 |
| 9 | ALDH1A1 | rs348461  | 74734890 | A/T | 0.36 | 0.60 | 0.33 | 0.26 |
| 9 | ALDH1A1 | rs13959   | 74735702 | A/G | 0.48 | 1.00 | 0.73 | 1.00 |
| 9 | ALDH1A1 | rs8187910 | 74739630 | G/A | 0.10 | 0.55 | 0.14 | 1.00 |
| 9 | ALDH1A1 | rs1330286 | 74742773 | G/C | 0.34 | 0.43 | 0.54 | 1.00 |
| 9 | ALDH1A1 | rs8187889 | 74749821 | G/A | 0.04 | 1.00 | 0.01 | 1.00 |
| 9 | ALDH1A1 | rs8187884 | 74751606 | A/C | 0.06 | 0.70 | 0.12 | 1.00 |
| 9 | ALDH1A1 | rs1424482 | 74753377 | G/A | 0.37 | 0.44 | 0.64 | 0.65 |
| 9 | ALDH1A1 | rs8187876 | 74754774 | A/G | 0.10 | 0.21 | 0.18 | 1.00 |

---

Abbreviations: AA: African American; MAF, minor allele frequency

**Supplementary Table S2.** Associations of SNPs in *ABCB1*, *ABCC1*, and *ALDH1A1* with grade 3 and 4 hematological toxicity in S0221 trial

| Gene  | SNP        | Genotype | # cases/ controls | OR (95% CI)*     | P    |
|-------|------------|----------|-------------------|------------------|------|
| ABCB1 | rs17064    | AA       | 513/246           | 1.00             | 0.60 |
|       |            | AT/TT    | 79/44             | 1.11 (0.74-1.67) |      |
| ABCB1 | rs2235048  | AA       | 143/84            | 1.00             | 0.26 |
|       |            | AG       | 294/134           | 0.77 (0.55-1.09) |      |
|       |            | GG       | 154/72            | 0.8 (0.54-1.19)  |      |
| ABCB1 | rs12720066 | AA       | 538/259           | 1.00             | 0.57 |
|       |            | AC/CC    | 54/31             | 1.15 (0.72-1.84) |      |
| ABCB1 | rs4148735  | GG       | 181/94            | 1.00             | 0.40 |
|       |            | GA       | 298/148           | 0.95 (0.69-1.31) |      |
|       |            | AA       | 112/47            | 0.82 (0.54-1.26) |      |
| ABCB1 | rs2235013  | GG       | 145/82            | 1.00             | 0.26 |
|       |            | GA       | 308/147           | 0.81 (0.58-1.14) |      |
|       |            | AA       | 137/61            | 0.8 (0.53-1.2)   |      |
| ABCB1 | rs2032588  | GG       | 512/249           | 1.00             | 0.78 |
|       |            | GA/AA    | 79/41             | 1.06 (0.7-1.6)   |      |
| ABCB1 | rs11772987 | CC       | 466/226           | 1.00             | 0.87 |
|       |            | CG/GG    | 126/64            | 1.03 (0.73-1.45) |      |
| ABCB1 | rs868755   | CC       | 220/102           | 1.00             | 0.38 |
|       |            | CA       | 288/138           | 1.02 (0.74-1.4)  |      |
|       |            | AA       | 84/49             | 1.25 (0.81-1.92) |      |
| ABCB1 | rs6950978  | AA       | 290/162           | 1.00             | 0.07 |
|       |            | AT       | 247/107           | 0.78 (0.58-1.05) |      |
|       |            | TT       | 55/21             | 0.69 (0.4-1.19)  |      |
| ABCB1 | rs12334183 | AA       | 400/185           | 1.00             | 0.27 |
|       |            | AG/GG    | 191/105           | 1.18 (0.88-1.6)  |      |
| ABCB1 | rs13226726 | GG       | 486/238           | 1.00             | 0.85 |
|       |            | GA/AA    | 106/51            | 0.96 (0.66-1.4)  |      |
| ABCB1 | rs1202172  | AA       | 269/138           | 1.00             | 0.84 |
|       |            | AC       | 263/118           | 0.87 (0.65-1.18) |      |
|       |            | CC       | 60/33             | 1.08 (0.67-1.73) |      |
| ABCB1 | rs4148733  | AA       | 420/215           | 1.00             | 0.35 |
|       |            | AG       | 149/68            | 0.92 (0.66-1.28) |      |

|       |            |       |         |                  |      |
|-------|------------|-------|---------|------------------|------|
|       |            | GG    | 20/7    | 0.65 (0.27-1.58) |      |
| ABCB1 | rs17327624 | CC    | 381/190 | 1.00             | 0.63 |
|       |            | CA    | 180/88  | 1 (0.73-1.36)    |      |
|       |            | AA    | 30/12   | 0.77 (0.38-1.54) |      |
| ABCB1 | rs2888599  | GG    | 541/265 | 1.00             | 0.95 |
|       |            | GA/AA | 50/25   | 0.98 (0.59-1.63) |      |
| ABCB1 | rs2214102  | GG    | 503/253 | 1.00             | 0.47 |
|       |            | GA/AA | 89/37   | 0.86 (0.57-1.3)  |      |
| ABCC1 | rs215105   | AA    | 531/271 | 1.00             | 0.07 |
|       |            | AG/GG | 58/18   | 0.6 (0.35-1.05)  |      |
| ABCC1 | rs215101   | CC    | 426/202 | 1.00             | 0.33 |
|       |            | CG    | 148/77  | 1.12 (0.81-1.55) |      |
|       |            | GG    | 17/11   | 1.38 (0.63-3.02) |      |
| ABCC1 | rs215100   | AA    | 281/144 | 1.00             | 0.94 |
|       |            | AG    | 251/110 | 0.86 (0.64-1.17) |      |
|       |            | GG    | 60/36   | 1.19 (0.74-1.89) |      |
| ABCC1 | rs12930197 | AA    | 419/201 | 1.00             | 0.53 |
|       |            | AG    | 150/78  | 1.11 (0.8-1.54)  |      |
|       |            | GG    | 21/11   | 1.12 (0.53-2.39) |      |
| ABCC1 | rs182482   | AA    | 295/144 | 1.00             | 0.66 |
|       |            | AG    | 242/115 | 0.97 (0.72-1.3)  |      |
|       |            | GG    | 54/31   | 1.22 (0.74-1.99) |      |
| ABCC1 | rs17501011 | GG    | 542/275 | 1.00             | 0.10 |
|       |            | GA/AA | 50/15   | 0.61 (0.33-1.11) |      |
| ABCC1 | rs152023   | AA    | 268/126 | 1.00             | 0.28 |
|       |            | AG    | 261/124 | 0.99 (0.73-1.35) |      |
|       |            | GG    | 62/40   | 1.4 (0.89-2.21)  |      |
| ABCC1 | rs246219   | GG    | 422/209 | 1.00             | 0.74 |
|       |            | GA    | 148/70  | 0.96 (0.69-1.34) |      |
|       |            | AA    | 16/11   | 1.43 (0.65-3.17) |      |
| ABCC1 | rs152022   | GG    | 354/182 | 1.00             | 0.64 |
|       |            | GC    | 201/88  | 0.85 (0.63-1.17) |      |
|       |            | CC    | 36/20   | 1.07 (0.6-1.92)  |      |
| ABCC1 | rs17501331 | AA    | 487/247 | 1.00             | 0.23 |
|       |            | AG/GG | 105/43  | 0.79 (0.53-1.16) |      |
| ABCC1 | rs6498595  | GG    | 464/224 | 1.00             | 0.57 |

|       |            |       |         |                  |       |
|-------|------------|-------|---------|------------------|-------|
|       |            | GC/CC | 127/66  | 1.1 (0.78-1.56)  |       |
| ABCC1 | rs11075289 | GG    | 250/130 | 1.00             | 0.72  |
|       |            | GA    | 264/121 | 0.89 (0.65-1.2)  |       |
|       |            | AA    | 76/39   | 0.99 (0.63-1.54) |       |
| ABCC1 | rs16967145 | GG    | 421/183 | 1.00             | 0.06  |
|       |            | GA    | 148/94  | 1.42 (1.03-1.96) |       |
|       |            | AA    | 22/13   | 1.24 (0.6-2.57)  |       |
| ABCC1 | rs3784863  | AA    | 303/156 | 1.00             | 0.42  |
|       |            | AC    | 239/112 | 0.91 (0.68-1.23) |       |
|       |            | CC    | 47/20   | 0.83 (0.47-1.46) |       |
| ABCC1 | rs246240   | AA    | 419/210 | 1.00             | 0.60  |
|       |            | AG/GG | 173/80  | 0.92 (0.67-1.26) |       |
| ABCC1 | rs246238   | TT    | 455/229 | 1.00             | 0.53  |
|       |            | TA/AA | 136/61  | 0.9 (0.63-1.27)  |       |
| ABCC1 | rs11642957 | GG    | 150/89  | 1.00             | 0.20  |
|       |            | GA    | 294/134 | 0.77 (0.55-1.08) |       |
|       |            | AA    | 147/67  | 0.77 (0.52-1.15) |       |
| ABCC1 | rs16967126 | AA    | 507/229 | 1.00             | 0.02  |
|       |            | AG/GG | 85/61   | 1.55 (1.08-2.25) |       |
| ABCC1 | rs246233   | AA    | 484/240 | 1.00             | 0.73  |
|       |            | AC/CC | 108/50  | 0.94 (0.65-1.36) |       |
| ABCC1 | rs903880   | CC    | 355/148 | 1.00             | 0.006 |
|       |            | CA    | 191/108 | 1.38 (1.02-1.88) |       |
|       |            | AA    | 46/34   | 1.86 (1.1-3.15)  |       |
| ABCC1 | rs8054670  | AA    | 361/170 | 1.00             | 0.97  |
|       |            | AG    | 193/108 | 1.17 (0.86-1.58) |       |
|       |            | GG    | 36/12   | 0.7 (0.35-1.39)  |       |
| ABCC1 | rs246230   | GG    | 428/205 | 1.00             | 0.32  |
|       |            | GA    | 149/70  | 0.98 (0.7-1.36)  |       |
|       |            | AA    | 15/15   | 1.97 (0.93-4.16) |       |
| ABCC1 | rs246227   | AA    | 459/231 | 1.00             | 0.93  |
|       |            | AG    | 118/46  | 0.79 (0.54-1.16) |       |
|       |            | GG    | 15/13   | 1.6 (0.73-3.49)  |       |
| ABCC1 | rs12445600 | AA    | 344/158 | 1.00             | 0.42  |
|       |            | AG    | 202/109 | 1.15 (0.85-1.56) |       |
|       |            | GG    | 45/23   | 1.11 (0.65-1.92) |       |

|       |            |       |         |                  |      |
|-------|------------|-------|---------|------------------|------|
| ABCC1 | rs3765129  | GG    | 450/220 | 1.00             | 0.82 |
|       |            | GA/AA | 141/69  | 1.04 (0.74-1.46) |      |
| ABCC1 | rs35596    | AA    | 329/149 | 1.00             | 0.33 |
|       |            | AG    | 219/115 | 1.13 (0.83-1.53) |      |
|       |            | GG    | 42/25   | 1.26 (0.71-2.21) |      |
| ABCC1 | rs17287570 | AA    | 408/193 | 1.00             | 0.49 |
|       |            | AC    | 164/87  | 1.11 (0.81-1.53) |      |
|       |            | CC    | 19/10   | 1.14 (0.51-2.53) |      |
| ABCC1 | rs9932506  | GG    | 168/88  | 1.00             | 0.57 |
|       |            | GA    | 281/137 | 0.96 (0.69-1.34) |      |
|       |            | AA    | 143/65  | 0.89 (0.6-1.32)  |      |
| ABCC1 | rs35621    | GG    | 472/233 | 1.00             | 1.00 |
|       |            | GA    | 111/51  | 0.93 (0.64-1.34) |      |
|       |            | AA    | 9/6     | 1.41 (0.49-4.05) |      |
| ABCC1 | rs4148350  | CC    | 527/244 | 1.00             | 0.05 |
|       |            | CA/AA | 65/46   | 1.52 (1.01-2.29) |      |
| ABCC1 | rs4148354  | AA    | 165/76  | 1.00             | 0.53 |
|       |            | AG    | 271/131 | 1.07 (0.75-1.51) |      |
|       |            | GG    | 155/83  | 1.13 (0.77-1.67) |      |
| ABCC1 | rs3887412  | AA    | 404/199 | 1.00             | 0.86 |
|       |            | AT    | 160/80  | 1.02 (0.74-1.4)  |      |
|       |            | TT    | 26/11   | 0.86 (0.41-1.8)  |      |
| ABCC1 | rs10852377 | GG    | 349/171 | 1.00             | 0.99 |
|       |            | GA    | 173/83  | 0.99 (0.72-1.37) |      |
|       |            | AA    | 68/35   | 1.01 (0.64-1.59) |      |
| ABCC1 | rs2889517  | GG    | 294/133 | 1.00             | 0.29 |
|       |            | GA    | 234/119 | 1.11 (0.82-1.5)  |      |
|       |            | AA    | 64/38   | 1.26 (0.8-1.99)  |      |
| ABCC1 | rs2074087  | GG    | 418/210 | 1.00             | 0.77 |
|       |            | GC    | 140/64  | 0.9 (0.64-1.27)  |      |
|       |            | CC    | 28/15   | 1.04 (0.54-2.01) |      |
| ABCC1 | rs2074085  | AA    | 459/225 | 1.00             | 1.00 |
|       |            | AG/GG | 132/65  | 1 (0.71-1.4)     |      |
| ABCC1 | rs8053266  | GG    | 555/271 | 1.00             | 0.75 |
|       |            | GA/AA | 33/18   | 1.1 (0.61-2.01)  |      |
| ABCC1 | rs11861115 | GG    | 351/167 | 1.00             | 0.91 |

|         |            |       |         |                  |       |
|---------|------------|-------|---------|------------------|-------|
|         |            | GA    | 202/108 | 1.12 (0.83-1.51) |       |
|         |            | AA    | 37/15   | 0.82 (0.44-1.55) |       |
| ABCC1   | rs11864374 | GG    | 344/175 | 1.00             | 0.23  |
|         |            | GA    | 206/102 | 0.97 (0.72-1.31) |       |
|         |            | AA    | 42/13   | 0.58 (0.3-1.12)  |       |
| ABCC1   | rs3784867  | GG    | 375/191 | 1.00             | 0.60  |
|         |            | GA    | 194/85  | 0.84 (0.61-1.15) |       |
|         |            | AA    | 23/14   | 1.18 (0.59-2.37) |       |
| ABCC1   | rs3887893  | AA    | 213/111 | 1.00             | 0.50  |
|         |            | AG    | 265/127 | 0.93 (0.68-1.27) |       |
|         |            | GG    | 112/52  | 0.88 (0.58-1.32) |       |
| ABCC1   | rs9673292  | GG    | 551/273 | 1.00             | 0.62  |
|         |            | GC    | 40/17   | 0.86 (0.48-1.55) |       |
| ABCC1   | rs4148373  | GG    | 538/263 | 1.00             | 0.78  |
|         |            | GA/AA | 51/27   | 1.07 (0.66-1.76) |       |
| ABCC1   | rs2299670  | AA    | 233/125 | 1.00             | 0.57  |
|         |            | AG    | 278/120 | 0.78 (0.57-1.06) |       |
|         |            | GG    | 79/45   | 1.01 (0.65-1.58) |       |
| ABCC1   | rs212081   | GG    | 245/114 | 1.00             | 0.36  |
|         |            | GA    | 269/134 | 1.09 (0.8-1.49)  |       |
|         |            | AA    | 77/42   | 1.22 (0.78-1.9)  |       |
| ABCC1   | rs212082   | AA    | 375/186 | 1.00             | 0.62  |
|         |            | AG    | 186/93  | 0.98 (0.72-1.33) |       |
|         |            | GG    | 29/11   | 0.79 (0.38-1.62) |       |
| ABCC1   | rs212087   | GG    | 239/115 | 1.00             | 0.71  |
|         |            | GA    | 265/134 | 1.05 (0.78-1.43) |       |
|         |            | AA    | 82/41   | 1.07 (0.69-1.67) |       |
| ALDH1A1 | rs8187996  | GG    | 543/253 | 1.00             | 0.04  |
|         |            | GA/AA | 49/37   | 1.64 (1.04-2.58) |       |
| ALDH1A1 | rs3764435  | AA    | 145/100 | 1.00             | 0.004 |
|         |            | AC    | 286/127 | 0.63 (0.45-0.88) |       |
|         |            | CC    | 160/63  | 0.57 (0.38-0.85) |       |
| ALDH1A1 | rs168351   | AA    | 452/232 | 1.00             | 0.22  |
|         |            | AG/GG | 139/58  | 0.8 (0.57-1.14)  |       |
| ALDH1A1 | rs1888202  | GG    | 171/76  | 1.00             | 0.23  |
|         |            | GC    | 278/131 | 1.04 (0.73-1.46) |       |



|         |           |       |         |                  |      |
|---------|-----------|-------|---------|------------------|------|
|         |           | CC    | 143/83  | 1.27 (0.86-1.88) |      |
| ALDH1A1 | rs63319   | CC    | 176/71  | 1.00             | 0.05 |
|         |           | CA    | 277/135 | 1.19 (0.84-1.68) |      |
|         |           | AA    | 139/84  | 1.48 (1-2.18)    |      |
| ALDH1A1 | rs8187950 | AA    | 551/276 | 1.00             | 0.25 |
|         |           | AG/GG | 40/13   | 0.68 (0.36-1.31) |      |
| ALDH1A1 | rs348459  | AA    | 524/251 | 1.00             | 0.34 |
|         |           | AG/GG | 68/39   | 1.23 (0.8-1.88)  |      |
| ALDH1A1 | rs348461  | TT    | 257/113 | 1.00             | 0.15 |
|         |           | TA    | 260/131 | 1.15 (0.84-1.57) |      |
|         |           | AA    | 75/46   | 1.36 (0.88-2.1)  |      |
| ALDH1A1 | rs13959   | GG    | 146/85  | 1.00             | 0.10 |
|         |           | GA    | 287/139 | 0.84 (0.59-1.17) |      |
|         |           | AA    | 159/66  | 0.72 (0.48-1.07) |      |
| ALDH1A1 | rs8187910 | AA    | 486/224 | 1.00             | 0.10 |
|         |           | AG/GG | 106/64  | 1.34 (0.94-1.92) |      |
| ALDH1A1 | rs1330286 | CC    | 251/116 | 1.00             | 0.36 |
|         |           | CG    | 263/129 | 1.06 (0.78-1.44) |      |
|         |           | GG    | 76/44   | 1.24 (0.81-1.93) |      |
| ALDH1A1 | rs8187889 | AA    | 558/264 | 1.00             | 0.06 |
|         |           | AG/GG | 33/26   | 1.68 (0.98-2.89) |      |
| ALDH1A1 | rs8187884 | CC    | 513/254 | 1.00             | 0.66 |
|         |           | CA/AA | 79/36   | 0.91 (0.59-1.39) |      |
| ALDH1A1 | rs1424482 | AA    | 235/109 | 1.00             | 0.27 |
|         |           | AG    | 263/124 | 1 (0.73-1.37)    |      |
|         |           | GG    | 94/57   | 1.31 (0.87-1.96) |      |
| ALDH1A1 | rs8187876 | GG    | 484/238 | 1.00             | 0.83 |
|         |           | GA/AA | 108/52  | 0.96 (0.66-1.39) |      |

Footnote: \* Logistic regression model adjusted for age of diagnosis, treatment arm and genetic ancestry.

**Supplementary Table S3.** Associations of SNPs in *ABCB1*, *ABCC1*, and *ALDH1A1* with grade 3 gastrointestinal toxicity in S0221 trial

| Gene  | SNP        | Genotype | # cases/ controls | OR (95% CI)      | P    |
|-------|------------|----------|-------------------|------------------|------|
| ABCB1 | rs17064    | AA       | 652/107           | 1.00             | 0.70 |
|       |            | AT/TT    | 104/19            | 1.11 (0.65-1.9)  |      |
| ABCB1 | rs2235048  | AA       | 200/27            | 1.00             | 0.20 |
|       |            | AG       | 367/61            | 1.2 (0.73-1.96)  |      |
|       |            | GG       | 188/38            | 1.43 (0.83-2.46) |      |
| ABCB1 | rs12720066 | AA       | 687/110           | 1.00             | 0.25 |
|       |            | AC/CC    | 69/16             | 1.41 (0.79-2.52) |      |
| ABCB1 | rs4148735  | GG       | 235/40            | 1.00             | 0.62 |
|       |            | GA       | 380/66            | 1.02 (0.67-1.56) |      |
|       |            | AA       | 139/20            | 0.84 (0.47-1.5)  |      |
| ABCB1 | rs2235013  | GG       | 188/39            | 1.00             | 0.30 |
|       |            | GA       | 395/60            | 0.73 (0.47-1.13) |      |
|       |            | AA       | 171/27            | 0.77 (0.45-1.32) |      |
| ABCB1 | rs2032588  | GG       | 654/107           | 1.00             | 0.45 |
|       |            | GA/AA    | 101/19            | 1.23 (0.72-2.12) |      |
| ABCB1 | rs11772987 | CC       | 593/99            | 1.00             | 0.92 |
|       |            | CG/GG    | 163/27            | 1.02 (0.64-1.62) |      |
| ABCB1 | rs868755   | CC       | 279/43            | 1.00             | 0.69 |
|       |            | CA       | 364/62            | 1.05 (0.68-1.62) |      |
|       |            | AA       | 112/21            | 1.13 (0.63-2.01) |      |
| ABCB1 | rs6950978  | AA       | 389/63            | 1.00             | 0.97 |
|       |            | AT       | 301/53            | 1.07 (0.72-1.59) |      |
|       |            | TT       | 66/10             | 0.9 (0.44-1.85)  |      |
| ABCB1 | rs12334183 | AA       | 504/81            | 1.00             | 0.43 |
|       |            | AG/GG    | 251/45            | 1.18 (0.79-1.76) |      |
| ABCB1 | rs13226726 | GG       | 620/104           | 1.00             | 0.79 |
|       |            | GA/AA    | 135/22            | 0.93 (0.57-1.54) |      |
| ABCB1 | rs1202172  | AA       | 351/56            | 1.00             | 0.50 |
|       |            | AC       | 326/55            | 1.09 (0.73-1.64) |      |
|       |            | CC       | 78/15             | 1.22 (0.66-2.28) |      |
| ABCB1 | rs4148733  | AA       | 541/94            | 1.00             | 0.59 |
|       |            | AG/GG    | 212/32            | 0.89 (0.58-1.37) |      |

|       |            |       |         |                  |      |
|-------|------------|-------|---------|------------------|------|
| ABCB1 | rs17327624 | CC    | 486/85  | 1.00             | 0.48 |
|       |            | CA/AA | 269/41  | 0.87 (0.58-1.3)  |      |
| ABCB1 | rs2888599  | GG    | 691/115 | 1.00             | 0.66 |
|       |            | GA/AA | 65/10   | 0.86 (0.42-1.72) |      |
| ABCB1 | rs2214102  | GG    | 652/104 | 1.00             | 0.29 |
|       |            | GA/AA | 104/22  | 1.32 (0.79-2.2)  |      |
| ABCC1 | rs215105   | AA    | 683/119 | 1.00             | 0.17 |
|       |            | AG/GG | 69/7    | 0.57 (0.25-1.27) |      |
| ABCC1 | rs215101   | CC    | 537/91  | 1.00             | 0.97 |
|       |            | CG/GG | 218/35  | 0.99 (0.65-1.52) |      |
| ABCC1 | rs215100   | AA    | 363/62  | 1.00             | 0.83 |
|       |            | AG    | 309/52  | 1.01 (0.68-1.51) |      |
|       |            | GG    | 84/12   | 0.89 (0.45-1.75) |      |
| ABCC1 | rs12930197 | AA    | 534/86  | 1.00             | 0.59 |
|       |            | AG/GG | 220/40  | 1.12 (0.74-1.69) |      |
| ABCC1 | rs182482   | AA    | 370/69  | 1.00             | 0.32 |
|       |            | AG    | 310/47  | 0.83 (0.55-1.24) |      |
|       |            | GG    | 75/10   | 0.78 (0.38-1.61) |      |
| ABCC1 | rs17501011 | GG    | 696/121 | 1.00             | 0.11 |
|       |            | GA/AA | 60/5    | 0.46 (0.18-1.18) |      |
| ABCC1 | rs152023   | AA    | 333/61  | 1.00             | 0.35 |
|       |            | AG    | 331/54  | 0.91 (0.61-1.36) |      |
|       |            | GG    | 91/11   | 0.71 (0.36-1.43) |      |
| ABCC1 | rs246219   | GG    | 540/91  | 1.00             | 0.98 |
|       |            | GA/AA | 211/34  | 0.99 (0.65-1.53) |      |
| ABCC1 | rs152022   | GG    | 454/82  | 1.00             | 0.35 |
|       |            | GC/CC | 302/43  | 0.83 (0.55-1.24) |      |
| ABCC1 | rs17501331 | AA    | 628/106 | 1.00             | 0.68 |
|       |            | AG/GG | 128/20  | 0.9 (0.53-1.5)   |      |
| ABCC1 | rs6498595  | GG    | 593/95  | 1.00             | 0.28 |
|       |            | GC/CC | 162/31  | 1.29 (0.82-2.02) |      |
| ABCC1 | rs11075289 | GG    | 328/52  | 1.00             | 0.40 |
|       |            | GA    | 331/54  | 1.06 (0.7-1.6)   |      |
|       |            | AA    | 96/19   | 1.32 (0.74-2.35) |      |
| ABCC1 | rs16967145 | GG    | 521/83  | 1.00             | 0.38 |
|       |            | GA/AA | 234/43  | 1.2 (0.8-1.81)   |      |

|       |            |       |         |                  |      |
|-------|------------|-------|---------|------------------|------|
| ABCC1 | rs3784863  | AA    | 394/65  | 1.00             | 0.64 |
|       |            | AC    | 301/50  | 1.03 (0.69-1.54) |      |
|       |            | CC    | 56/11   | 1.21 (0.6-2.45)  |      |
| ABCC1 | rs246240   | AA    | 539/90  | 1.00             | 0.94 |
|       |            | AG/GG | 217/36  | 0.98 (0.65-1.5)  |      |
| ABCC1 | rs246238   | TT    | 587/97  | 1.00             | 0.66 |
|       |            | TA/AA | 168/29  | 1.11 (0.7-1.75)  |      |
| ABCC1 | rs11642957 | GG    | 202/37  | 1.00             | 0.11 |
|       |            | GA    | 363/65  | 0.9 (0.57-1.41)  |      |
|       |            | AA    | 190/24  | 0.62 (0.35-1.1)  |      |
| ABCC1 | rs16967126 | AA    | 631/105 | 1.00             | 0.93 |
|       |            | AG/GG | 125/21  | 1.02 (0.61-1.71) |      |
| ABCC1 | rs246233   | AA    | 623/101 | 1.00             | 0.58 |
|       |            | AC/CC | 133/25  | 1.15 (0.71-1.85) |      |
| ABCC1 | rs903880   | CC    | 437/66  | 1.00             | 0.18 |
|       |            | CA    | 250/49  | 1.34 (0.89-2.01) |      |
|       |            | AA    | 69/11   | 1.33 (0.62-2.87) |      |
| ABCC1 | rs8054670  | AA    | 459/72  | 1.00             | 0.37 |
|       |            | AG/GG | 295/54  | 1.19 (0.81-1.75) |      |
| ABCC1 | rs246230   | GG    | 544/89  | 1.00             | 0.64 |
|       |            | GA/AA | 212/37  | 1.11 (0.72-1.69) |      |
| ABCC1 | rs246227   | AA    | 585/105 | 1.00             | 0.25 |
|       |            | AG/GG | 171/21  | 0.74 (0.44-1.24) |      |
| ABCC1 | rs12445600 | AA    | 440/62  | 1.00             | 0.07 |
|       |            | AG    | 259/52  | 1.42 (0.95-2.11) |      |
|       |            | GG    | 56/12   | 1.54 (0.78-3.04) |      |
| ABCC1 | rs3765129  | GG    | 582/88  | 1.00             | 0.10 |
|       |            | GA/AA | 172/38  | 1.42 (0.93-2.17) |      |
| ABCC1 | rs35596    | AA    | 420/58  | 1.00             | 0.02 |
|       |            | AG    | 277/57  | 1.58 (1.05-2.36) |      |
|       |            | GG    | 56/11   | 1.75 (0.84-3.63) |      |
| ABCC1 | rs17287570 | AA    | 508/93  | 1.00             | 0.10 |
|       |            | AC/CC | 247/33  | 0.7 (0.45-1.07)  |      |
| ABCC1 | rs9932506  | GG    | 220/36  | 1.00             | 0.47 |
|       |            | GA    | 364/54  | 0.88 (0.55-1.39) |      |
|       |            | AA    | 172/36  | 1.22 (0.73-2.03) |      |

|       |            |       |         |                  |      |
|-------|------------|-------|---------|------------------|------|
| ABCC1 | rs35621    | GG    | 605/100 | 1.00             | 0.88 |
|       |            | GA/AA | 151/26  | 1.04 (0.65-1.66) |      |
| ABCC1 | rs4148350  | CC    | 656/115 | 1.00             | 0.20 |
|       |            | CA/AA | 100/11  | 0.65 (0.34-1.25) |      |
| ABCC1 | rs4148354  | AA    | 192/49  | 1.00             | 0.03 |
|       |            | AG    | 355/47  | 0.53 (0.34-0.83) |      |
|       |            | GG    | 208/30  | 0.6 (0.36-1)     |      |
| ABCC1 | rs3887412  | AA    | 515/88  | 1.00             | 0.92 |
|       |            | AT/TT | 239/38  | 0.98 (0.64-1.49) |      |
| ABCC1 | rs10852377 | GG    | 444/76  | 1.00             | 0.81 |
|       |            | GA    | 219/37  | 1.03 (0.67-1.59) |      |
|       |            | AA    | 90/13   | 0.88 (0.46-1.67) |      |
| ABCC1 | rs2889517  | GG    | 351/76  | 1.00             | 0.02 |
|       |            | GA    | 315/38  | 0.57 (0.37-0.86) |      |
|       |            | AA    | 90/12   | 0.62 (0.32-1.2)  |      |
| ABCC1 | rs2074087  | GG    | 536/92  | 1.00             | 0.81 |
|       |            | GC/CC | 213/34  | 0.95 (0.62-1.45) |      |
| ABCC1 | rs2074085  | AA    | 585/99  | 1.00             | 0.90 |
|       |            | AG/GG | 170/27  | 0.97 (0.61-1.54) |      |
| ABCC1 | rs8053266  | GG    | 705/121 | 1.00             | 0.34 |
|       |            | GA/AA | 46/5    | 0.63 (0.24-1.62) |      |
| ABCC1 | rs11861115 | GG    | 431/87  | 1.00             | 0.01 |
|       |            | GA/AA | 323/39  | 0.61 (0.4-0.91)  |      |
| ABCC1 | rs11864374 | GG    | 440/79  | 1.00             | 0.36 |
|       |            | GA/AA | 316/47  | 0.83 (0.56-1.23) |      |
| ABCC1 | rs3784867  | GG    | 480/86  | 1.00             | 0.41 |
|       |            | GA/AA | 276/40  | 0.84 (0.56-1.27) |      |
| ABCC1 | rs3887893  | AA    | 277/47  | 1.00             | 0.68 |
|       |            | AG    | 333/59  | 1.06 (0.7-1.61)  |      |
|       |            | GG    | 144/20  | 0.85 (0.48-1.49) |      |
| ABCC1 | rs9673292  | GG    | 710/114 | 1.00             | 0.17 |
|       |            | GC    | 46/11   | 1.63 (0.81-3.29) |      |
| ABCC1 | rs4148373  | GG    | 686/115 | 1.00             | 0.94 |
|       |            | GA/AA | 67/11   | 0.97 (0.5-1.9)   |      |
| ABCC1 | rs2299670  | AA    | 304/54  | 1.00             | 1.00 |
|       |            | AG    | 344/54  | 0.91 (0.6-1.37)  |      |

|         |           |       |         |                  |      |
|---------|-----------|-------|---------|------------------|------|
|         |           | GG    | 106/18  | 1.08 (0.59-1.95) |      |
| ABCC1   | rs212081  | GG    | 304/55  | 1.00             | 0.61 |
|         |           | GA    | 349/54  | 0.84 (0.56-1.27) |      |
|         |           | AA    | 102/17  | 0.93 (0.52-1.68) |      |
| ABCC1   | rs212082  | AA    | 487/74  | 1.00             | 0.26 |
|         |           | AG/GG | 267/52  | 1.25 (0.85-1.84) |      |
| ABCC1   | rs212087  | GG    | 302/52  | 1.00             | 0.26 |
|         |           | GA    | 338/61  | 1.02 (0.68-1.53) |      |
|         |           | AA    | 111/12  | 0.6 (0.31-1.18)  |      |
| ALDH1A1 | rs8187996 | GG    | 680/116 | 1.00             | 0.45 |
|         |           | GA/AA | 76/10   | 0.77 (0.38-1.53) |      |
| ALDH1A1 | rs3764435 | AA    | 209/36  | 1.00             | 0.71 |
|         |           | AC    | 355/58  | 0.89 (0.56-1.42) |      |
|         |           | CC    | 191/32  | 0.9 (0.53-1.54)  |      |
| ALDH1A1 | rs168351  | AA    | 586/98  | 1.00             | 0.81 |
|         |           | AG/GG | 169/28  | 0.95 (0.6-1.5)   |      |
| ALDH1A1 | rs1888202 | GG    | 212/35  | 1.00             | 0.63 |
|         |           | GC    | 352/57  | 0.98 (0.62-1.55) |      |
|         |           | CC    | 192/34  | 1.15 (0.68-1.95) |      |
| ALDH1A1 | rs63319   | CC    | 213/34  | 1.00             | 0.97 |
|         |           | CA    | 350/62  | 1.11 (0.71-1.75) |      |
|         |           | AA    | 193/30  | 1 (0.59-1.71)    |      |
| ALDH1A1 | rs8187950 | AA    | 707/120 | 1.00             | 0.32 |
|         |           | AG/GG | 48/5    | 0.62 (0.24-1.59) |      |
| ALDH1A1 | rs348459  | AA    | 667/108 | 1.00             | 0.28 |
|         |           | AG/GG | 89/18   | 1.36 (0.78-2.38) |      |
| ALDH1A1 | rs348461  | TT    | 319/51  | 1.00             | 0.58 |
|         |           | TA    | 336/55  | 1.01 (0.67-1.53) |      |
|         |           | AA    | 101/20  | 1.21 (0.69-2.13) |      |
| ALDH1A1 | rs13959   | GG    | 193/38  | 1.00             | 0.43 |
|         |           | GA    | 371/55  | 0.72 (0.46-1.14) |      |
|         |           | AA    | 192/33  | 0.81 (0.49-1.37) |      |
| ALDH1A1 | rs8187910 | AA    | 609/101 | 1.00             | 0.86 |
|         |           | AG/GG | 146/24  | 1.04 (0.64-1.69) |      |
| ALDH1A1 | rs1330286 | CC    | 309/58  | 1.00             | 0.82 |
|         |           | CG    | 344/48  | 0.76 (0.5-1.15)  |      |

|         |           |       |         |                  |      |
|---------|-----------|-------|---------|------------------|------|
|         |           | GG    | 100/20  | 1.11 (0.63-1.95) |      |
| ALDH1A1 | rs8187889 | AA    | 705/117 | 1.00             | 0.89 |
|         |           | AG/GG | 50/9    | 1.06 (0.5-2.22)  |      |
| ALDH1A1 | rs8187884 | CC    | 656/111 | 1.00             | 0.81 |
|         |           | CA/AA | 100/15  | 0.93 (0.52-1.67) |      |
| ALDH1A1 | rs1424482 | AA    | 289/55  | 1.00             | 0.67 |
|         |           | AG    | 345/42  | 0.65 (0.42-1.01) |      |
|         |           | GG    | 122/29  | 1.35 (0.81-2.25) |      |
| ALDH1A1 | rs8187876 | GG    | 622/100 | 1.00             | 0.38 |
|         |           | GA/AA | 134/26  | 1.24 (0.77-1.99) |      |

---

Footnote: \* Logistic regression model adjusted for age of diagnosis, treatment arm and genetic ancestry.
